# Supplementary material for: PARP inhibitor increases chemosensitivity by upregulating miR-664b-5p in BRCA1-mutated triple-negative breast cancer
Source: PubMed Central journal article supplement (PMC5296748; doi:10.1038/srep42319), 2017-02-08
Supplement: srep42319-s1.pdf [file srep42319-s1.pdf]

**PARP inhibitor increases chemosensitivity by upregulating miR-664b-5p in  
BRCA1-mutated triple-negative breast cancer**

Wei Song<sup>1</sup>, Lin Tang<sup>2</sup>, Yumei Xu<sup>1</sup>, Jing Xu<sup>3</sup>, Wenwen Zhang<sup>2</sup>, Hui Xie<sup>4</sup>, Shui Wang<sup>4</sup>, Xiaoxiang Guan<sup>1,2</sup>

<sup>1</sup>Department of Medical Oncology, Jinling Hospital, Southern Medical University, Guangzhou, 510515, China.

<sup>2</sup>Department of Medical Oncology, Jinling Hospital, Medical School of Nanjing University, Nanjing, 210002, China.

<sup>3</sup>Department of Medical Oncology, Jinling Hospital, Nanjing Medical University, Nanjing, 210002, China.

<sup>4</sup>Department of Breast Surgery, The First Affiliated Hospital of Nanjing Medical University, 300 Guangzhou Road, Nanjing, 210029, China.

Correspondence and requests for materials should be addressed to X. G. (email: xguan@nju.edu.cn) or S. W. (email: ws0801@hotmail.com).

# S1

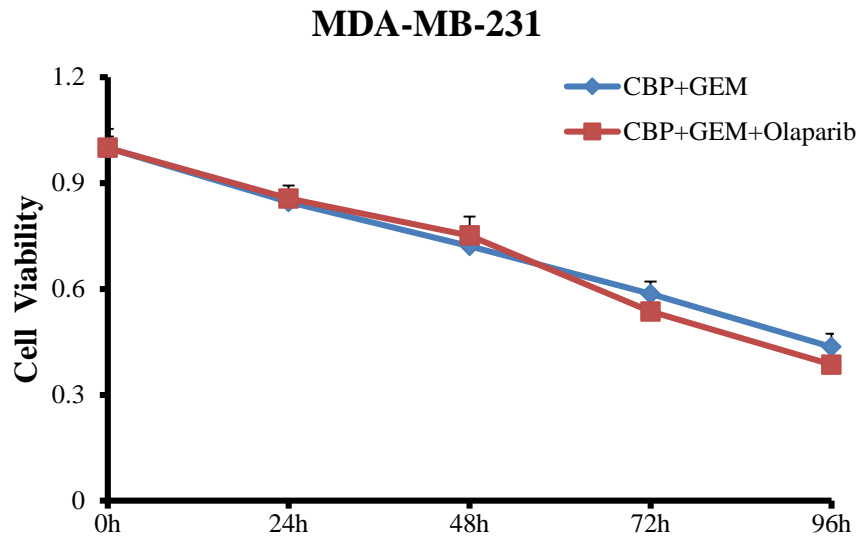

**Supplementary Fig. 1.** The non-BRCA1-mutated TNBC cell line MDA-MB-231 were treated with CBP (10  $\mu$ M) plus GEM (100 nM) combined with or without olaparib (10  $\mu$ M) for the indicated times, and then, the cell viability was determined with an MTT assay. The results show data from six independent experiments expressed as the mean  $\pm$  SD.  $p < 0.05$ .

S2

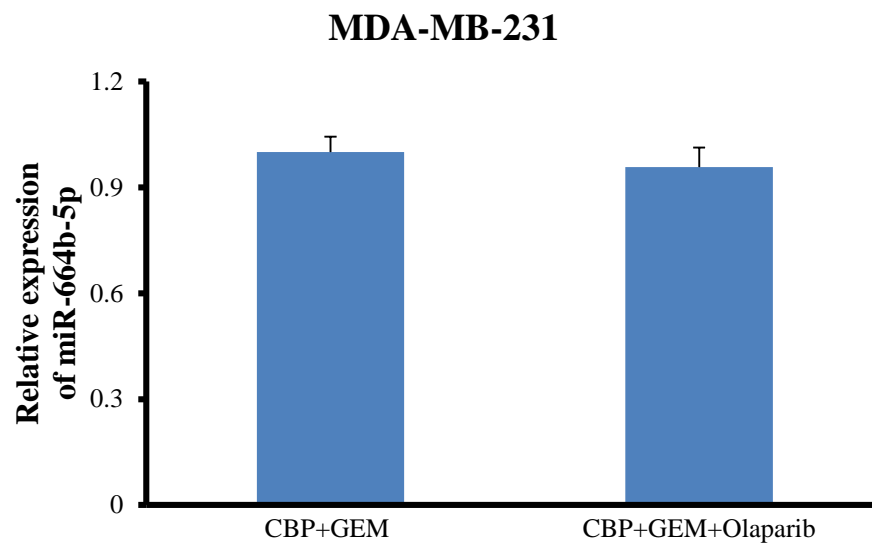

**Supplementary Fig. 2.** The expression of miR-664b-5p in non-BRCA1-mutated TNBC cell line MDA-MB-231 after treated with CBP plus GEM combined with or without olaparib was measured with qRT-PCR.
